# Supplementary material
Source: ML conference proceedings conference paper supplement (https://proceedings.neurips.cc/paper_files/paper/2016/hash/43e4e6a6f341e00671e123714de019a8-Abstract.html)
Supplement: Supplementary file [file 43e4e6a6f341e00671e123714de019a8-Supplemental.zip]

## A Appendix

### Definition 1.

1. We define following quantities:

$$\begin{aligned}\tilde{x} &:= \arg \min_{x' \in \Omega} \langle \nabla f(x), x' - x \rangle + \frac{1}{2\gamma} \|x' - x\|^2, \\ \bar{x}_k &:= \arg \min_{x \in \Omega} \langle \nabla f(\hat{x}_k), x - x_k \rangle + \frac{1}{2\gamma} \|x - x_k\|^2, \\ \tilde{x}_k &:= \arg \min_{x \in \Omega} \langle \nabla f(x_k), x - x_k \rangle + \frac{1}{2\gamma} \|x - x_k\|^2.\end{aligned}$$

2. For each iteration  $k$  we define  $A_k$  as the set containing the coordinates should be selected in each block if the cooresponding block is selected in that iteration. Therefore,  $A_k = \{a_{k_1}, \dots, a_{k_n}\}$  where  $a_{k_i} \in S_i$  is the selected index of coordinate if  $S_i$  is selected in that iteration.

**Lemma 1.** Let  $\rho$  be a constant with

$$\rho > (1 - 2/\sqrt{n})^{-1} \quad (12)$$

and define the quantity  $\psi$  as follows:

$$\psi := L_{\max} + \frac{L_{\text{res}} T \rho^T}{\sqrt{n}} \left( 2 + \frac{L_{\max}}{\sqrt{n} L_{\text{res}}} + \frac{2T}{n} \right).$$

Suppose that the steplength parameter  $\gamma > 0$  satisfies the following two upper bounds:

$$\gamma \leq 1/\psi \quad (13)$$

$$\gamma \leq \left( 1 - \frac{1}{\rho} - \frac{2}{\sqrt{n}} \right) \frac{\sqrt{n}}{4L_{\text{res}} T \rho^T}. \quad (14)$$

Then we have

$$\mathbb{E} \|x_{k-1} - \bar{x}_k\|^2 \leq \rho \mathbb{E} \|x_k - \bar{x}_{k+1}\|^2, k = 1, 2, \dots$$

*Proof.* This can be proved by following exactly the same procedure in Theorem 4 of [17] and noting that

$$\|(x_k - \bar{x}_k)_{A_k}\|^2 \leq \|x_k - \bar{x}_k\|^2,$$

where  $(x_k - \bar{x}_k)_{A_k}$  is a zero vector with coordinates in  $A_k$  set to the corresponding coordinates in  $x_k - \bar{x}_k$ .  $\square$

**Lemma 2.** Given the requirements in Lemma 1 hold, we have

$$\mathbb{E} \|\bar{x}_k - x_k\|^2 \geq \frac{1}{2 \left( \frac{\gamma^2 L_T^2 T^2 \rho^T}{n} + 1 \right)} \mathbb{E} \|\tilde{x}_k - x_k\|^2. \quad (15)$$

*Proof.* Since the projection operator is nonexpansive,

$$\begin{aligned}\|\bar{x}_k - \tilde{x}_k\| &\leq \|P_{\Omega}(x_k - \gamma \nabla f(\hat{x}_k)) - P_{\Omega}(x_k - \gamma \nabla f(x_k))\| \\ &\leq \|x_k - \gamma \nabla f(\hat{x}_k) - (x_k - \gamma \nabla f(x_k))\| \\ &= \gamma \|\nabla f(\hat{x}_k) - \nabla f(x_k)\|.\end{aligned}$$

Thus

$$\begin{aligned}
\mathbb{E}\|\bar{x}_k - \tilde{x}_k\|^2 &\leq \gamma^2 \mathbb{E}\|\nabla f(\hat{x}_k) - \nabla f(x_k)\|^2 \\
&\leq \gamma^2 L_T^2 \mathbb{E}\|\hat{x}_k - x_k\|^2 \\
&\stackrel{(3)}{=} \gamma^2 L_T^2 \mathbb{E}\left\|\sum_{j \in J(k)} (x_{j+1} - x_j)\right\|^2 \\
&\leq \gamma^2 L_T^2 T \sum_{j \in J(k)} \mathbb{E}\|x_{j+1} - x_j\|^2 \\
&\leq \frac{\gamma^2 L_T^2 T}{n} \sum_{j \in J(k)} \mathbb{E}\|\bar{x}_j - x_j\|^2 \\
&\leq \frac{\gamma^2 L_T^2 T^2 \rho^T}{n} \mathbb{E}\|\bar{x}_k - x_k\|^2.
\end{aligned} \tag{16}$$

Thus

$$\begin{aligned}
\mathbb{E}\|\tilde{x}_k - x_k\|^2 &= \mathbb{E}\|\tilde{x}_k - \bar{x}_k + \bar{x}_k - x_k\|^2 \\
&\leq 2\mathbb{E}\|\tilde{x}_k - \bar{x}_k\|^2 + 2\mathbb{E}\|\bar{x}_k - x_k\|^2 \\
&\stackrel{(16)}{\leq} \frac{2\gamma^2 L_T^2 T^2 \rho^T}{n} \mathbb{E}\|\bar{x}_k - x_k\|^2 + 2\mathbb{E}\|\bar{x}_k - x_k\|^2 \\
&= 2\left(\frac{\gamma^2 L_T^2 T^2 \rho^T}{n} + 1\right) \mathbb{E}\|\bar{x}_k - x_k\|^2.
\end{aligned}$$

It immediately follows that

$$\mathbb{E}\|\bar{x}_k - x_k\|^2 \geq \frac{1}{2\left(\frac{\gamma^2 L_T^2 T^2 \rho^T}{n} + 1\right)} \mathbb{E}\|\tilde{x}_k - x_k\|^2.$$

□

## Proof to Theorem 2

*Proof.* We start from

$$\mathbb{E}(f(x_{k+1})) - f^* = \mathbb{E}(f(x_k)) - f^* + \underbrace{(\mathbb{E}(f(x_{k+1})) - \mathbb{E}(f(x_k)))}_{T_1}.$$

Firstly, we bound  $T_1$  by

$$\begin{aligned}
T_1 &= \mathbb{E}(f(x_{k+1})) - \mathbb{E}(f(x_k)) \\
&\leq \mathbb{E}\langle \nabla f(x_k), x_{k+1} - x_k \rangle + \frac{L_{\max}}{2} \mathbb{E}\|x_{k+1} - x_k\|^2 \\
&= \mathbb{E}\langle \nabla f(\hat{x}_k), x_{k+1} - x_k \rangle + \frac{L_{\max}}{2} \mathbb{E}\|x_{k+1} - x_k\|^2 + \mathbb{E}\langle \nabla f(x_k) - \nabla f(\hat{x}_k), x_{k+1} - x_k \rangle \\
&\leq \mathbb{E}\langle \nabla f(\hat{x}_k), x_{k+1} - x_k \rangle + \frac{3L_{\max}}{2} \mathbb{E}\|x_{k+1} - x_k\|^2 \\
&\quad + \mathbb{E}\langle \nabla f(x_k) - \nabla f(\hat{x}_k), x_{k+1} - x_k \rangle.
\end{aligned}$$

Since

$$\begin{aligned}
x_{k+1} &= \arg \min_{x \in \Omega_{i_k}} \langle \nabla_{i_k} f(\hat{x}_k), x - x_k \rangle + \frac{1}{2\gamma} \|x - x_k\|^2 \\
&= \arg \min_{x \in \Omega_{i_k}} \langle \nabla_{i_k} f(\hat{x}_k), x - x_k \rangle + \frac{3L_{\max}}{2} \|x - x_k\|^2,
\end{aligned}$$

and denote  $\Omega_{S_k}$  as the Cartesian product of  $\Omega_i, i \in S_k$ , we have

$$\begin{aligned}
T_1 &\leq \mathbb{E} \left( \min_{x \in \Omega_{i_k}} \left( \langle \nabla f(\hat{x}_k), x - x_k \rangle + \frac{3L_{\max}}{2} \|x - x_k\|^2 \right) \right) \\
&\quad + \mathbb{E} \langle \nabla f(x_k) - \nabla f(\hat{x}_k), x_{k+1} - x_k \rangle \\
&\leq \mathbb{E} \left( \frac{1}{m} \min_{x \in \Omega_{S_k}} \left( \langle \nabla f(\hat{x}_k), x - x_k \rangle + \frac{3L_{\max}}{2} \|x - x_k\|^2 \right) \right) \\
&\quad + \mathbb{E} \langle \nabla f(x_k) - \nabla f(\hat{x}_k), x_{k+1} - x_k \rangle \\
&= \mathbb{E} \left( \frac{1}{mn} \min_{x \in \Omega} \left( \langle \nabla f(\hat{x}_k), x - x_k \rangle + \frac{3L_{\max}}{2} \|x - x_k\|^2 \right) \right) \\
&\quad + \mathbb{E} \langle \nabla f(x_k) - \nabla f(\hat{x}_k), x_{k+1} - x_k \rangle.
\end{aligned}$$

Since  $mn = N$ , we have

$$\begin{aligned}
T_1 &\leq \frac{1}{N} \mathbb{E} \left( \langle \nabla f(\hat{x}_k), \bar{x}_k - x_k \rangle + \frac{3L_{\max}}{2} \|\bar{x}_k - x_k\|^2 \right) \\
&\quad + \frac{1}{n} \mathbb{E} \langle \nabla f(x_k) - \nabla f(\hat{x}_k), (\bar{x}_k - x_k)_{A_k} \rangle \\
&\leq \frac{1}{N} \mathbb{E} \left( \langle \nabla f(\hat{x}_k), \bar{x}_k - x_k \rangle + \frac{3L_{\max}}{2} \|\bar{x}_k - x_k\|^2 \right) \\
&\quad + \frac{1}{n} \mathbb{E} \|(\nabla f(x_k) - \nabla f(\hat{x}_k))\| \|(\bar{x}_k - x_k)_{A_k}\| \\
&\leq \frac{1}{N} \mathbb{E} \left( \langle \nabla f(\hat{x}_k), \bar{x}_k - x_k \rangle + \frac{3L_{\max}}{2} \|\bar{x}_k - x_k\|^2 \right) \\
&\quad + \frac{L_{\text{res}}}{n} \mathbb{E} \sum_{j \in J(k)} \|x_{j+1} - x_j\| \|\bar{x}_k - x_k\| \\
&= \frac{1}{N} \mathbb{E} \left( \langle \nabla f(\hat{x}_k), \bar{x}_k - x_k \rangle + \frac{3L_{\max}}{2} \|\bar{x}_k - x_k\|^2 \right) \\
&\quad + \frac{L_{\text{res}}}{2n} \mathbb{E} \sum_{j \in J(k)} \left( \alpha \|x_{j+1} - x_j\|^2 + \frac{1}{\alpha} \|\bar{x}_k - x_k\|^2 \right) \\
&\leq \frac{1}{N} \mathbb{E} \left( \langle \nabla f(\hat{x}_k), \bar{x}_k - x_k \rangle + \frac{3L_{\max}}{2} \|\bar{x}_k - x_k\|^2 \right) \\
&\quad + \frac{L_{\text{res}}}{2n} \mathbb{E} \sum_{j \in J(k)} \left( \frac{\alpha}{n} \|\bar{x}_j - x_j\|^2 + \frac{1}{\alpha} \|\bar{x}_k - x_k\|^2 \right),
\end{aligned}$$

where  $\alpha > 0$ . Letting  $\alpha = \sqrt{n}$  we have

$$\begin{aligned}
T_1 &\leq \frac{1}{N} \mathbb{E} \left( \langle \nabla f(\hat{x}_k), \bar{x}_k - x_k \rangle + \frac{3L_{\max}}{2} \|\bar{x}_k - x_k\|^2 \right) \\
&\quad + \frac{L_{\text{res}}}{2n^{3/2}} \mathbb{E} \sum_{j \in J(k)} (\|\bar{x}_j - x_j\|^2 + \|\bar{x}_k - x_k\|^2) \\
&\leq \frac{1}{N} \mathbb{E} \left( \langle \nabla f(\hat{x}_k), \bar{x}_k - x_k \rangle + \frac{3L_{\max}}{2} \|\bar{x}_k - x_k\|^2 \right) + \frac{L_{\text{res}} \rho^T T}{n^{3/2}} \mathbb{E} \|\bar{x}_k - x_k\|^2.
\end{aligned}$$

where the last step comes from Lemma 1. Next we verify the requirements in Lemma 1 are satisfied, so that we can safely apply it. If the following holds

$$\begin{aligned}
T(T+1) &\leq \frac{\sqrt{n}L_{\max}}{4eL_{\text{res}}} \\
\gamma &= \frac{1}{3L_{\max}}, \\
\rho &:= 1 + \frac{4eTL_{\text{res}}}{\sqrt{n}L_{\max}} \\
\psi &:= L_{\max} + \frac{L_{\text{res}}T\rho^T}{\sqrt{n}} \left( 2 + \frac{L_{\max}}{\sqrt{n}L_{\text{res}}} + \frac{2T}{n} \right)
\end{aligned}$$

where the first two are from the requirements of this theorem and the other two are defined here, we have

$$T \leq T(T+1) \leq \frac{\sqrt{n}L_{\max}}{4eL_{\text{res}}} \quad (17)$$

and

$$\begin{aligned}
\rho^T &= \left( 1 + \frac{4eTL_{\text{res}}}{\sqrt{n}L_{\max}} \right)^T \\
&\leq \left( 1 + \left( \frac{4eL_{\text{res}}}{\sqrt{n}L_{\max}} \right)^{1/2} \right)^{\left( \frac{\sqrt{n}L_{\max}}{4eL_{\text{res}}} \right)^{1/2}} \\
&\leq e.
\end{aligned} \quad (18)$$

Thus for (14), note that

$$\begin{aligned}
&\left( 1 - \frac{1}{\rho} - \frac{2}{\sqrt{n}} \right) \frac{\sqrt{n}}{4L_{\text{res}}T\rho^T} \\
&= \left( \frac{\rho-1}{\rho} - \frac{2}{\sqrt{n}} \right) \frac{\sqrt{n}}{4L_{\text{res}}T\rho^T} \\
&= \frac{e}{L_{\max}\rho^{T+1}} - \frac{1}{2L_{\text{res}}T\rho^T} \\
&\geq \frac{1}{L_{\max}} - \frac{1}{2L_{\max}} = \frac{1}{2L_{\max}}.
\end{aligned}$$

Thus we can verify (14) by

$$\gamma = \frac{1}{3L_{\max}} \leq \frac{1}{2L_{\max}} \leq \left( 1 - \frac{1}{\rho} - \frac{2}{\sqrt{n}} \right) \frac{\sqrt{n}}{4L_{\text{res}}T\rho^T}.$$

Next we verify (12):

$$\rho = 1 + \frac{4eTL_{\text{res}}}{\sqrt{n}L_{\max}} > (1 - 2/\sqrt{n})^{-1},$$

by noting that for  $n \geq 6$

$$1 + \frac{4eTL_{\text{res}}}{\sqrt{n}L_{\max}} \geq 1 + \frac{4e}{\sqrt{n}} \geq \left( 1 - \frac{2}{\sqrt{n}} \right)^{-1}.$$

We verify (13) in the last. Note that

$$\begin{aligned}
\psi &= L_{\max} + \frac{L_{\text{res}}T\rho^T}{\sqrt{n}} \left( 2 + \frac{L_{\max}}{\sqrt{n}L_{\text{res}}} + \frac{2T}{n} \right) \\
&\stackrel{(18)}{\leq} L_{\max} + \frac{L_{\text{res}}Te}{\sqrt{n}} \left( 2 + \frac{L_{\max}}{\sqrt{n}L_{\text{res}}} + \frac{2T}{n} \right) \\
&\stackrel{(17)}{\leq} L_{\max} + \frac{L_{\max}}{2} \left( 2 + \frac{L_{\max}}{\sqrt{n}L_{\text{res}}} + \frac{L_{\max}}{\sqrt{n}eL_{\text{res}}} \right) \\
&\leq L_{\max} + L_{\max} \left( 1 + \frac{1}{\sqrt{n}} \right) \\
&\leq 3L_{\max},
\end{aligned}$$

where the second last step comes from  $L_{\max} \leq L_{\text{res}}$ . Thus

$$1/\psi \geq \frac{1}{3L_{\max}} = \gamma.$$

Therefore our choice satisfies the requirements in Lemma 1.

Since the optimality condition for

$$\bar{x}_k = \arg \min_{x \in \Omega} \langle \nabla f(\hat{x}_k), x - x_k \rangle + \frac{1}{2\gamma} \|x - x_k\|^2$$

is

$$\begin{aligned} \left\langle x - \bar{x}_k, \nabla f(\hat{x}_k) + \frac{1}{\gamma}(\bar{x}_k - x_k) \right\rangle &\geq 0, \forall x \in \Omega \\ \Rightarrow \langle x - \bar{x}_k, \nabla f(\hat{x}_k) \rangle &\geq \frac{1}{\gamma} \|\bar{x}_k - x_k\|^2, \end{aligned}$$

we have

$$\begin{aligned} T_1 &\leq \frac{1}{N} \mathbb{E} \left( \langle \nabla f(\hat{x}_k), \bar{x}_k - x_k \rangle + \frac{3L_{\max}}{2} \|\bar{x}_k - x_k\|^2 \right) + \frac{L_{\text{res}} \rho^T T}{n^{3/2}} \mathbb{E} \|\bar{x}_k - x_k\|^2 \\ &\leq \frac{1}{N} \mathbb{E} \left( -\frac{1}{\gamma} \|\bar{x}_k - x_k\|^2 + \frac{3L_{\max}}{2} \|\bar{x}_k - x_k\|^2 \right) + \frac{L_{\text{res}} \rho^T T}{n^{3/2}} \mathbb{E} \|\bar{x}_k - x_k\|^2 \\ &= \left( \frac{1}{N} \left( \frac{3L_{\max}}{2} - \frac{1}{\gamma} \right) + \frac{L_{\text{res}} \rho^T T}{n^{3/2}} \right) \mathbb{E} \|\bar{x}_k - x_k\|^2. \end{aligned}$$

Thus putting the upper bound for  $T_1$  in, we obtain

$$\mathbb{E}(f(x_{k+1})) - f^* = \mathbb{E}(f(x_k)) - f^* + \left( \frac{1}{N} \left( \frac{3L_{\max}}{2} - \frac{1}{\gamma} \right) + \frac{L_{\text{res}} \rho^T T}{n^{3/2}} \right) \mathbb{E} \|\bar{x}_k - x_k\|^2 \quad (19)$$

Note that

$$\begin{aligned} \left( \frac{1}{N} \left( \frac{3L_{\max}}{2} - \frac{1}{\gamma} \right) + \frac{L_{\text{res}} \rho^T T}{n^{3/2}} \right) &\leq \left( \frac{1}{n} \left( \frac{3L_{\max}}{2} - \frac{1}{\gamma} \right) + \frac{L_{\text{res}} \rho^T T}{n^{3/2}} \right) \\ &= \frac{1}{n} \left( \left( \frac{3L_{\max}}{2} - \frac{1}{\gamma} \right) + \frac{L_{\text{res}} \rho^T T}{\sqrt{n}} \right) \\ &\leq \frac{1}{n} \left( -\frac{3L_{\max}}{2} + \frac{L_{\text{res}} e^{\frac{\sqrt{n} L_{\max}}{4e L_{\text{res}}}}}{\sqrt{n}} \right) \\ &= \frac{1}{n} \left( -\frac{3L_{\max}}{2} + \frac{L_{\max}}{4} \right) \\ &\leq 0. \end{aligned}$$

Thus using Lemma 2 and putting  $\rho^T \leq e, T^2 \leq \frac{\sqrt{n}L_{\max}}{4eL_{\text{res}}}, T \leq \frac{\sqrt{n}L_{\max}}{4eL_{\text{res}}}, \gamma = \frac{1}{3L_{\max}}$  in (19), we have

$$\begin{aligned}
& \mathbb{E}(f(x_{k+1})) - f^* \\
& \stackrel{(15)}{\leq} \mathbb{E}(f(x_k)) - f^* \\
& \quad + \left( \frac{1}{N} \left( \frac{3L_{\max}}{2} - \frac{1}{\gamma} \right) + \frac{L_{\text{res}}\rho^T T}{n^{3/2}} \right) \frac{1}{2 \left( \frac{\gamma^2 L_T^2 T^2 \rho^T}{n} + 1 \right)} \mathbb{E} \|\tilde{x}_k - x_k\|^2 \\
& \stackrel{(17),(18)}{\leq} \mathbb{E}(f(x_k)) - f^* \\
& \quad + \left( \frac{1}{N} \left( \frac{3L_{\max}}{2} - \frac{1}{\gamma} \right) + \frac{L_{\text{res}}\rho^T T}{n^{3/2}} \right) \frac{1}{2 \left( \frac{\frac{1}{9L_{\max}^2} L_T^2 \frac{\sqrt{n}L_{\max}}{4eL_{\text{res}}} e}{n} + 1 \right)} \mathbb{E} \|\tilde{x}_k - x_k\|^2 \\
& = \mathbb{E}(f(x_k)) - f^* \\
& \quad + \left( \frac{1}{N} \left( \frac{3L_{\max}}{2} - \frac{1}{\gamma} \right) + \frac{L_{\text{res}}\rho^T T}{n^{3/2}} \right) \frac{1}{2 \left( \frac{L_T^2}{36L_{\max}L_{\text{res}}\sqrt{n}} + 1 \right)} \mathbb{E} \|\tilde{x}_k - x_k\|^2 \\
& = \mathbb{E}(f(x_k)) - f^* \\
& \quad + \left( \frac{1}{N} \left( \frac{3L_{\max}}{2} - \frac{1}{\gamma} \right) + \frac{L_{\text{res}}\rho^T T}{n^{3/2}} \right) \underbrace{\left( \frac{L_T^2}{18L_{\text{res}}L_{\max}\sqrt{n}} + 2 \right)^{-1}}_{b, \text{ as defined in Theorem 2}} \mathbb{E} \|\tilde{x}_k - x_k\|^2 \\
& \leq \mathbb{E}(f(x_k)) - f^* + \left( \frac{1}{N} \left( \frac{3L_{\max}}{2} - \frac{1}{\gamma} \right) + \frac{L_{\text{res}}\rho^T T}{n^{3/2}} \right) b \frac{2(\mathbb{E}f(x_k) - f^*)}{L\kappa^2} \quad (20) \\
& = \left( 1 + \frac{2b}{L\kappa^2} \left( \frac{1}{N} \left( \frac{3L_{\max}}{2} - \frac{1}{\gamma} \right) + \frac{L_{\text{res}}\rho^T T}{n^{3/2}} \right) \right) (\mathbb{E}f(x_k) - f^*) \\
& \stackrel{(18),(17)}{\leq} \left( 1 - \frac{2b}{L\kappa^2 n \gamma} \left( 1 - \left( 3L_{\max} + \frac{2L_{\text{res}}e\sqrt{n}L_{\max}}{4eL_{\text{res}}} \right) \frac{\gamma}{2} \right) \right) (\mathbb{E}f(x_k) - f^*) \\
& = \left( 1 - \frac{2b}{L\kappa^2 n \gamma} \left( 1 - \frac{7}{4} L_{\max} \gamma \right) \right) (\mathbb{E}f(x_k) - f^*) \\
& = \left( 1 - \frac{6bL_{\max}}{L\kappa^2 n} \left( 1 - \frac{7}{12} \right) \right) (\mathbb{E}f(x_k) - f^*) \\
& \leq \left( 1 - \frac{2bL_{\max}}{L\kappa^2 n} \right) (\mathbb{E}f(x_k) - f^*),
\end{aligned}$$

where (20) comes from

$$\begin{aligned}
f(x) - f^* & \leq \frac{L}{2} \|x - \mathcal{P}_S(x)\|^2 \\
\stackrel{(7)}{\implies} \frac{2(f(x) - f^*)}{L} & \leq \kappa^2 \|\tilde{x} - x\|^2,
\end{aligned}$$

completing the proof.  $\square$
